# Supplementary material for: Mutational Signatures Are Critical for Proper Estimation of Purifying Selection Pressures in Cancer Somatic Mutation Data When Using the dN/dS Metric
Source: Front Genet. 2017 Jun 8;8:74. doi: 10.3389/fgene.2017.00074 (PMC5462936; doi:10.3389/fgene.2017.00074)
Supplement: Table S5 — GO cellular components gene set enrichment results on genes with low simulated dN/dS values. A gene set enrichment analysis for GO cellular components was performed for the genes that had simulated dN/dS values below 0.35. Simulations were performed using the 6-class and the 96-class malignant melanoma signature, respectively (indicated by tab names). Cellular components are ranked based on increasing enrichment p-values. [file Table5.XLSX]

## Sheet: 6-class simulation
	n_genes_in_cc	n_genes_neg	n_genes_pos	prop_neg	prop_pos	p	q	genes
MYOSIN_COMPLEX	16	11	5	0.1	1.9	2.60794e-06	0.000607649	MYL5,MYH6,MYH7,MYLPF,MYL9
CONTRACTILE_FIBER_PART	21	16	5	0.1	1.9	1.14351e-05	0.00133219	TNNC1,MYL5,TPM2,MYLPF,MYL9
CONTRACTILE_FIBER	23	18	5	0.1	1.9	1.84567e-05	0.00143347	TNNC1,MYL5,TPM2,MYLPF,MYL9
CYTOSKELETAL_PART	221	209	12	1.2	4.7	0.000116127	0.0067644	TNNC1,MYL5,TPM2,MYH6,MYH9,GAS8,MYH7,MYLPF,DYNLL1,KRT31,MYL9,CETN1
CYTOSKELETON	340	325	15	1.9	5.8	0.000173404	0.00808061	TNNC1,MYL5,TPM2,MYH6,MYH9,IVL,GAS8,MYH7,MYLPF,DYNLL1,KRT31,MYL9,CETN1,PARVG,PPL
ACTIN_CYTOSKELETON	120	112	8	0.7	3.1	0.000415788	0.0161464	TNNC1,MYL5,TPM2,MYH6,MYH9,MYH7,MYLPF,MYL9
CELL_PROJECTION	102	95	7	0.6	2.7	0.000800363	0.0242072	S100A6,MYH9,GAS8,ACTN4,ITPR3,S100B,TESC
RUFFLE	29	25	4	0.1	1.6	0.000831147	0.0242072	S100A6,MYH9,S100B,TESC
NON_MEMBRANE_BOUND_ORGANELLE	577	559	18	3.3	7	0.00243709	0.0567842	TNNC1,MYL5,TPM2,MYH6,MYH9,IVL,GAS8,FAM32A,MYH7,MYLPF,DYNLL1,KRT31,MYL9,CETN1,RPS11,UBTF,PARVG,PPL
INTRACELLULAR_NON_MEMBRANE_BOUND_ORGANELLE	577	559	18	3.3	7	0.00243709	0.0567842	TNNC1,MYL5,TPM2,MYH6,MYH9,IVL,GAS8,FAM32A,MYH7,MYLPF,DYNLL1,KRT31,MYL9,CETN1,RPS11,UBTF,PARVG,PPL
LEADING_EDGE	44	40	4	0.2	1.6	0.00399489	0.084619	S100A6,MYH9,S100B,TESC
CYTOPLASM	1974	1931	43	11.2	16.7	0.00603561	0.117191	GNA11,S100A6,TNNC1,COX6B2,LRRC48,MYL5,CAV3,S100A1,TPM2,AP2S1,MYH9,AP1S1,IVL,ACTN4,MAP1LC3A,PRMT1,CXCL14,ADRBK1,MYLPF,GNAZ,KDELR1,CFL1,TRIM63,DYNLL1,ITPR3,HSPA1B,S100A7,PPP1R7,TWIST2,MYL9,CETN1,VPS26B,S100B,RPS11,GRK1,PRKCD,CARD9,TESC,STUB1,UBL5,CARD11,AP3D1,EHD4
IMMUNOLOGICAL_SYNAPSE	11	9	2	0.1	0.8	0.0109833	0.196855	MYH9,CARD11
DNA_DIRECTED_RNA_POLYMERASEII_CORE_COMPLEX	12	10	2	0.1	0.8	0.0130523	0.217228	POLR2L,POLR2J
SARCOMERE	13	11	2	0.1	0.8	0.0152763	0.237292	TNNC1,TPM2
VESICLE_COAT	15	13	2	0.1	0.8	0.0201692	0.259574	AP2S1,AP1S1
COATED_VESICLE_MEMBRANE	16	14	2	0.1	0.8	0.0228284	0.259574	AP2S1,AP1S1
MEMBRANE_COAT	16	14	2	0.1	0.8	0.0228284	0.259574	AP2S1,AP1S1
COATED_MEMBRANE	16	14	2	0.1	0.8	0.0228284	0.259574	AP2S1,AP1S1
MYOFIBRIL	17	15	2	0.1	0.8	0.0256232	0.259574	TNNC1,TPM2
DNA_DIRECTED_RNA_POLYMERASE_COMPLEX	17	15	2	0.1	0.8	0.0256232	0.259574	POLR2L,POLR2J
RNA_POLYMERASE_COMPLEX	17	15	2	0.1	0.8	0.0256232	0.259574	POLR2L,POLR2J
NUCLEAR_DNA_DIRECTED_RNA_POLYMERASE_COMPLEX	17	15	2	0.1	0.8	0.0256232	0.259574	POLR2L,POLR2J
NUCLEUS	1312	1284	28	7.5	10.9	0.0321347	0.311975	S100A6,ARL4C,SSNA1,MYH9,FAM32A,FHL2,TXNL4A,SNRPD2,LMO1,ACTN4,POLR2L,PRMT1,DAPK3,GNAZ,CFL1,ZNF423,HSPA1B,S100A7,POLR2J,PPP1R7,TWIST2,S100B,UBTF,PRKCD,EHD3,RHOB,TESC,EHD4
MACROMOLECULAR_COMPLEX	886	866	20	5	7.8	0.0402218	0.374867	TNNC1,MYL5,CAV3,AP2S1,MYH6,MYH9,AP1S1,MYH7,TXNL4A,SNRPD2,ACTN4,POLR2L,MYLPF,DYNLL1,POLR2J,MYL9,ZER1,RPS11,STUB1,CARD11
CYTOPLASMIC_VESICLE_MEMBRANE	26	24	2	0.1	0.8	0.0561594	0.484635	AP2S1,AP1S1
CYTOPLASMIC_VESICLE_PART	26	24	2	0.1	0.8	0.0561594	0.484635	AP2S1,AP1S1
PROTEIN_COMPLEX	766	749	17	4.4	6.6	0.0632647	0.514875	TNNC1,MYL5,CAV3,AP2S1,MYH6,MYH9,AP1S1,MYH7,ACTN4,POLR2L,MYLPF,DYNLL1,POLR2J,MYL9,ZER1,STUB1,CARD11
VESICLE_MEMBRANE	28	26	2	0.2	0.8	0.0640831	0.514875	AP2S1,AP1S1
ORGANELLE_PART	1114	1091	23	6.4	8.9	0.0664964	0.516456	TNNC1,COX6B2,MYL5,TPM2,AP2S1,MYH6,MYH9,AP1S1,GAS8,FAM32A,MYH7,TXNL4A,SNRPD2,MAP1LC3A,POLR2L,MYLPF,GNAZ,DYNLL1,KRT31,POLR2J,MYL9,CETN1,UBTF
INTRACELLULAR_ORGANELLE_PART	1109	1087	22	6.3	8.5	0.0988847	0.720887	TNNC1,COX6B2,MYL5,TPM2,AP2S1,MYH6,MYH9,AP1S1,GAS8,FAM32A,MYH7,TXNL4A,SNRPD2,POLR2L,MYLPF,GNAZ,DYNLL1,KRT31,POLR2J,MYL9,CETN1,UBTF
CLATHRIN_COATED_VESICLE	36	34	2	0.2	0.8	0.0990059	0.720887	AP2S1,AP1S1
BRUSH_BORDER	10	9	1	0.1	0.4	0.138522	0.974683	ITPR3
COATED_VESICLE	45	43	2	0.3	0.8	0.142997	0.974683	AP2S1,AP1S1
CYTOPLASMIC_PART	1291	1267	24	7.4	9.3	0.146412	0.974683	TNNC1,COX6B2,MYL5,CAV3,S100A1,TPM2,AP2S1,MYH9,AP1S1,ACTN4,MAP1LC3A,CXCL14,MYLPF,GNAZ,KDELR1,ITPR3,HSPA1B,S100A7,MYL9,CETN1,VPS26B,RPS11,AP3D1,EHD4
DYSTROPHIN_ASSOCIATED_GLYCOPROTEIN_COMPLEX	12	11	1	0.1	0.4	0.163841	1	CAV3
TRANS_GOLGI_NETWORK_TRANSPORT_VESICLE	12	11	1	0.1	0.4	0.163841	1	AP1S1
SPLICEOSOME	50	48	2	0.3	0.8	0.168917	1	TXNL4A,SNRPD2
PLASMA_MEMBRANE	1321	1297	24	7.5	9.3	0.172983	1	GNA11,LAPTM5,CAV3,AP2S1,GPR55,MYH9,MC3R,GNAZ,CD81,LRPAP1,ITPR3,GPR68,TSPAN9,BDKRB2,GNA15,CD151,TSPAN4,RHOB,RASA3,XCR1,STX1B,CD82,CYTH2,CARD11
CORNIFIED_ENVELOPE	13	12	1	0.1	0.4	0.176222	1	IVL
RECEPTOR_COMPLEX	53	51	2	0.3	0.8	0.184825	1	MYH9,CARD11
ENDOCYTIC_VESICLE	14	13	1	0.1	0.4	0.18842	1	AP2S1
ENDOPLASMIC_RETICULUM	274	268	6	1.6	2.3	0.221046	1	S100A1,GNAZ,ITPR3,HSPA1B,S100A7,EHD4
SPINDLE_POLE	18	17	1	0.1	0.4	0.235438	1	CETN1
DNA_DIRECTED_RNA_POLYMERASEII_HOLOENZYME	63	61	2	0.4	0.8	0.239053	1	POLR2L,POLR2J
BASAL_LAMINA	19	18	1	0.1	0.4	0.246762	1	CAV3
INTEGRIN_COMPLEX	19	18	1	0.1	0.4	0.246762	1	MYH9
SMALL_NUCLEAR_RIBONUCLEOPROTEIN_COMPLEX	22	21	1	0.1	0.4	0.279742	1	SNRPD2
LAMELLIPODIUM	22	21	1	0.1	0.4	0.279742	1	TESC
INTERMEDIATE_FILAMENT_CYTOSKELETON	23	22	1	0.1	0.4	0.290413	1	KRT31
CELL_CORTEX_PART	23	22	1	0.1	0.4	0.290413	1	MYH9
INTERMEDIATE_FILAMENT	23	22	1	0.1	0.4	0.290413	1	KRT31
ER_GOLGI_INTERMEDIATE_COMPARTMENT	24	23	1	0.1	0.4	0.300926	1	KDELR1
UBIQUITIN_LIGASE_COMPLEX	25	24	1	0.1	0.4	0.311284	1	ZER1
RIBONUCLEOPROTEIN_COMPLEX	134	131	3	0.8	1.2	0.318561	1	TXNL4A,SNRPD2,RPS11
GOLGI_ASSOCIATED_VESICLE	26	25	1	0.1	0.4	0.321488	1	AP1S1
LIPID_RAFT	27	26	1	0.2	0.4	0.331543	1	CARD11
MICROTUBULE_CYTOSKELETON	142	139	3	0.8	1.2	0.350946	1	GAS8,DYNLL1,CETN1
TRANSPORT_VESICLE	29	28	1	0.2	0.4	0.351208	1	AP1S1
MICROTUBULE	30	29	1	0.2	0.4	0.360824	1	GAS8
MEMBRANE	1831	1802	29	10.5	11.2	0.377525	1	GNA11,COX6B2,LAPTM5,CAV3,AP2S1,GPR55,MYH9,AP1S1,MAP1LC3A,MC3R,GNAZ,CD81,LRPAP1,KDELR1,ITPR3,GPR68,TSPAN9,CNIH2,BDKRB2,GNA15,CD151,TSPAN4,RHOB,RASA3,XCR1,STX1B,CD82,CYTH2,CARD11
PROTEINACEOUS_EXTRACELLULAR_MATRIX	91	89	2	0.5	0.8	0.39075	1	CAV3,CHAD
EXTRACELLULAR_MATRIX	92	90	2	0.5	0.8	0.395974	1	CAV3,CHAD
BASEMENT_MEMBRANE	34	33	1	0.2	0.4	0.397887	1	CAV3
RIBOSOME	35	34	1	0.2	0.4	0.406814	1	RPS11
SPINDLE	38	37	1	0.2	0.4	0.43281	1	CETN1
CELL_CORTEX	38	37	1	0.2	0.4	0.43281	1	MYH9
GOLGI_MEMBRANE	43	42	1	0.2	0.4	0.473638	1	AP1S1
CYTOPLASMIC_MEMBRANE_BOUND_VESICLE	108	106	2	0.6	0.8	0.476448	1	AP2S1,AP1S1
MICROTUBULE_ASSOCIATED_COMPLEX	44	43	1	0.3	0.4	0.481445	1	DYNLL1
MEMBRANE_BOUND_VESICLE	110	108	2	0.6	0.8	0.48605	1	AP2S1,AP1S1
CYTOPLASMIC_VESICLE	111	109	2	0.6	0.8	0.49081	1	AP2S1,AP1S1
NUCLEOLUS	111	109	2	0.6	0.8	0.49081	1	FAM32A,UBTF
VESICLE	116	114	2	0.7	0.8	0.514191	1	AP2S1,AP1S1
MITOCHONDRIAL_MEMBRANE_PART	49	48	1	0.3	0.4	0.518785	1	COX6B2
PLASMA_MEMBRANE_PART	1074	1058	16	6.2	6.2	0.525885	1	LAPTM5,CAV3,AP2S1,GPR55,MYH9,MC3R,CD81,GPR68,TSPAN9,BDKRB2,CD151,TSPAN4,XCR1,STX1B,CD82,CARD11
PERINUCLEAR_REGION_OF_CYTOPLASM	52	51	1	0.3	0.4	0.539891	1	ACTN4
CYTOSOL	193	190	3	1.1	1.2	0.546308	1	MYH9,S100A7,VPS26B
EXTRACELLULAR_MATRIX_PART	53	52	1	0.3	0.4	0.546719	1	CAV3
CENTROSOME	55	54	1	0.3	0.4	0.560074	1	CETN1
MITOCHONDRIAL_INNER_MEMBRANE	59	58	1	0.3	0.4	0.58562	1	COX6B2
INTEGRAL_TO_PLASMA_MEMBRANE	906	893	13	5.2	5	0.585774	1	LAPTM5,GPR55,MYH9,MC3R,CD81,GPR68,TSPAN9,BDKRB2,CD151,TSPAN4,XCR1,STX1B,CD82
ENDOMEMBRANE_SYSTEM	206	203	3	1.2	1.2	0.590564	1	AP2S1,AP1S1,GNAZ
ORGANELLE_MEMBRANE	280	276	4	1.6	1.6	0.597276	1	COX6B2,AP2S1,AP1S1,MAP1LC3A
INTRINSIC_TO_PLASMA_MEMBRANE	918	905	13	5.3	5	0.605003	1	LAPTM5,GPR55,MYH9,MC3R,CD81,GPR68,TSPAN9,BDKRB2,CD151,TSPAN4,XCR1,STX1B,CD82
GOLGI_APPARATUS	213	210	3	1.2	1.2	0.613218	1	AP1S1,CXCL14,AP3D1
VACUOLE	64	63	1	0.4	0.4	0.615483	1	MAP1LC3A
MICROTUBULE_ORGANIZING_CENTER	64	63	1	0.4	0.4	0.615483	1	CETN1
ORGANELLE_INNER_MEMBRANE	67	66	1	0.4	0.4	0.632362	1	COX6B2
NUCLEAR_ENVELOPE	68	67	1	0.4	0.4	0.637823	1	GNAZ
ENVELOPE	154	152	2	0.9	0.8	0.667721	1	COX6B2,GNAZ
ORGANELLE_ENVELOPE	154	152	2	0.9	0.8	0.667721	1	COX6B2,GNAZ
MEMBRANE_PART	1536	1515	21	8.8	8.1	0.680818	1	COX6B2,LAPTM5,CAV3,AP2S1,GPR55,MYH9,AP1S1,MC3R,CD81,LRPAP1,KDELR1,GPR68,TSPAN9,CNIH2,BDKRB2,CD151,TSPAN4,XCR1,STX1B,CD82,CARD11
NUCLEAR_PART	536	529	7	3.1	2.7	0.683623	1	FAM32A,TXNL4A,SNRPD2,POLR2L,GNAZ,POLR2J,UBTF
EXTRACELLULAR_REGION_PART	314	310	4	1.8	1.6	0.686093	1	CAV3,SFRP1,LALBA,CHAD
MITOCHONDRIAL_MEMBRANE	78	77	1	0.4	0.4	0.688176	1	COX6B2
MEMBRANE_FRACTION	326	322	4	1.9	1.6	0.713947	1	KDELR1,TSPAN9,CD151,CYTH2
INTEGRAL_TO_MEMBRANE	1219	1203	16	7	6.2	0.726605	1	LAPTM5,GPR55,MYH9,MC3R,CD81,LRPAP1,KDELR1,GPR68,TSPAN9,CNIH2,BDKRB2,CD151,TSPAN4,XCR1,STX1B,CD82
MITOCHONDRIAL_ENVELOPE	87	86	1	0.5	0.4	0.727499	1	COX6B2
EXTRACELLULAR_REGION	417	412	5	2.4	1.9	0.742401	1	CAV3,SFRP1,S100A7,LALBA,CHAD
INTRINSIC_TO_MEMBRANE	1235	1219	16	7.1	6.2	0.74519	1	LAPTM5,GPR55,MYH9,MC3R,CD81,LRPAP1,KDELR1,GPR68,TSPAN9,CNIH2,BDKRB2,CD151,TSPAN4,XCR1,STX1B,CD82
GOLGI_APPARATUS_PART	95	94	1	0.5	0.4	0.758285	1	AP1S1
NUCLEAR_LUMEN	358	354	4	2.1	1.6	0.779281	1	FAM32A,POLR2L,POLR2J,UBTF
NUCLEOPLASM_PART	199	197	2	1.1	0.8	0.796355	1	POLR2L,POLR2J
CELL_FRACTION	472	467	5	2.7	1.9	0.831293	1	ADRBK1,KDELR1,TSPAN9,CD151,CYTH2
EXTRACELLULAR_SPACE	227	225	2	1.3	0.8	0.85224	1	SFRP1,LALBA
MITOCHONDRIAL_PART	129	128	1	0.7	0.4	0.854867	1	COX6B2
ORGANELLE_LUMEN	424	420	4	2.4	1.6	0.876564	1	FAM32A,POLR2L,POLR2J,UBTF
MEMBRANE_ENCLOSED_LUMEN	424	420	4	2.4	1.6	0.876564	1	FAM32A,POLR2L,POLR2J,UBTF
SOLUBLE_FRACTION	152	151	1	0.9	0.4	0.897281	1	ADRBK1
NUCLEOPLASM	261	259	2	1.5	0.8	0.901207	1	POLR2L,POLR2J
MITOCHONDRION	314	312	2	1.8	0.8	0.948446	1	COX6B2,HSPA1B
EXTRINSIC_TO_PLASMA_MEMBRANE	12	12	0	0.1	0	1	1
CELL_PROJECTION_PART	19	19	0	0.1	0	1	1
MITOCHONDRIAL_OUTER_MEMBRANE	18	18	0	0.1	0	1	1
ORGANELLAR_RIBOSOME	21	21	0	0.1	0	1	1
ORGANELLAR_SMALL_RIBOSOMAL_SUBUNIT	11	11	0	0.1	0	1	1
INTRINSIC_TO_ENDOPLASMIC_RETICULUM_MEMBRANE	23	23	0	0.1	0	1	1
MITOCHONDRIAL_SMALL_RIBOSOMAL_SUBUNIT	11	11	0	0.1	0	1	1
OLIGOSACCHARYL_TRANSFERASE_COMPLEX	9	9	0	0.1	0	1	1
ADHERENS_JUNCTION	21	21	0	0.1	0	1	1
PEROXISOMAL_MEMBRANE	13	13	0	0.1	0	1	1
EXTERNAL_SIDE_OF_PLASMA_MEMBRANE	12	12	0	0.1	0	1	1
EUKARYOTIC_TRANSLATION_INITIATION_FACTOR_3_COMPLEX	9	9	0	0.1	0	1	1
VESICULAR_FRACTION	42	42	0	0.2	0	1	1
CELL_SURFACE	71	71	0	0.4	0	1	1
CELL_JUNCTION	77	77	0	0.4	0	1	1
PROTEIN_SERINE_THREONINE_PHOSPHATASE_COMPLEX	8	8	0	0	0	1	1
AXON	11	11	0	0.1	0	1	1
CHROMATIN	33	33	0	0.2	0	1	1
SYNAPSE_PART	12	12	0	0.1	0	1	1
NUCLEAR_REPLICATION_FORK	8	8	0	0	0	1	1
LATE_ENDOSOME	9	9	0	0.1	0	1	1
INTEGRAL_TO_GOLGI_MEMBRANE	9	9	0	0.1	0	1	1
NUCLEAR_CHROMOSOME	44	44	0	0.3	0	1	1
CHROMATIN_REMODELING_COMPLEX	15	15	0	0.1	0	1	1
TIGHT_JUNCTION	29	29	0	0.2	0	1	1
INTEGRAL_TO_ENDOPLASMIC_RETICULUM_MEMBRANE	23	23	0	0.1	0	1	1
INTERCELLULAR_JUNCTION	61	61	0	0.4	0	1	1
LYTIC_VACUOLE	56	56	0	0.3	0	1	1
MICROTUBULE_ORGANIZING_CENTER_PART	18	18	0	0.1	0	1	1
NADH_DEHYDROGENASE_COMPLEX	13	13	0	0.1	0	1	1
ENDOPLASMIC_RETICULUM_MEMBRANE	80	80	0	0.5	0	1	1
KINESIN_COMPLEX	14	14	0	0.1	0	1	1
INSOLUBLE_FRACTION	15	15	0	0.1	0	1	1
CYTOSOLIC_PART	20	20	0	0.1	0	1	1
PROTEASOME_COMPLEX	22	22	0	0.1	0	1	1
PORE_COMPLEX	35	35	0	0.2	0	1	1
INTERCALATED_DISC	8	8	0	0	0	1	1
SYNAPTIC_VESICLE	15	15	0	0.1	0	1	1
NUCLEAR_MATRIX	11	11	0	0.1	0	1	1
NUCLEAR_ENVELOPE_ENDOPLASMIC_RETICULUM_NETWORK	88	88	0	0.5	0	1	1
PEROXISOMAL_PART	14	14	0	0.1	0	1	1
CHROMOSOMEPERICENTRIC_REGION	29	29	0	0.2	0	1	1
VOLTAGE_GATED_CALCIUM_CHANNEL_COMPLEX	14	14	0	0.1	0	1	1
ANCHORED_TO_MEMBRANE	11	11	0	0.1	0	1	1
MEDIATOR_COMPLEX	16	16	0	0.1	0	1	1
MITOCHONDRIAL_MATRIX	43	43	0	0.3	0	1	1
VACUOLAR_PART	11	11	0	0.1	0	1	1
INTEGRATOR_COMPLEX	13	13	0	0.1	0	1	1
VOLTAGE_GATED_POTASSIUM_CHANNEL_COMPLEX	39	39	0	0.2	0	1	1
MICROSOME	40	40	0	0.2	0	1	1
OUTER_MEMBRANE	24	24	0	0.1	0	1	1
HISTONE_DEACETYLASE_COMPLEX	18	18	0	0.1	0	1	1
APICAL_JUNCTION_COMPLEX	32	32	0	0.2	0	1	1
MICROBODY_MEMBRANE	13	13	0	0.1	0	1	1
MITOCHONDRIAL_LUMEN	43	43	0	0.3	0	1	1
EARLY_ENDOSOME	18	18	0	0.1	0	1	1
SPINDLE_MICROTUBULE	15	15	0	0.1	0	1	1
CELL_SUBSTRATE_ADHERENS_JUNCTION	15	15	0	0.1	0	1	1
HETEROGENEOUS_NUCLEAR_RIBONUCLEOPROTEIN_COMPLEX	12	12	0	0.1	0	1	1
LYSOSOMAL_MEMBRANE	9	9	0	0.1	0	1	1
MITOCHONDRIAL_RESPIRATORY_CHAIN_COMPLEX_I	13	13	0	0.1	0	1	1
CONDENSED_NUCLEAR_CHROMOSOME	14	14	0	0.1	0	1	1
NUCLEAR_BODY	31	31	0	0.2	0	1	1
CELL_MATRIX_JUNCTION	17	17	0	0.1	0	1	1
ORGANELLE_OUTER_MEMBRANE	23	23	0	0.1	0	1	1
NUCLEAR_UBIQUITIN_LIGASE_COMPLEX	10	10	0	0.1	0	1	1
VACUOLAR_MEMBRANE	10	10	0	0.1	0	1	1
ACTIN_FILAMENT	15	15	0	0.1	0	1	1
ENDOSOME	62	62	0	0.4	0	1	1
APICAL_PART_OF_CELL	16	16	0	0.1	0	1	1
NICOTINIC_ACETYLCHOLINE_GATED_RECEPTOR_CHANNEL_COMPLEX	11	11	0	0.1	0	1	1
CELL_SOMA	10	10	0	0.1	0	1	1
REPLICATION_FORK	16	16	0	0.1	0	1	1
U12_DEPENDENT_SPLICEOSOME	10	10	0	0.1	0	1	1
MICROBODY_PART	14	14	0	0.1	0	1	1
DENDRITE	15	15	0	0.1	0	1	1
KINETOCHORE	23	23	0	0.1	0	1	1
NUCLEAR_CHROMATIN	13	13	0	0.1	0	1	1
SECRETORY_GRANULE	17	17	0	0.1	0	1	1
BASOLATERAL_PLASMA_MEMBRANE	33	33	0	0.2	0	1	1
INTEGRAL_TO_ORGANELLE_MEMBRANE	48	48	0	0.3	0	1	1
MITOCHONDRIAL_RESPIRATORY_CHAIN	22	22	0	0.1	0	1	1
GOLGI_STACK	12	12	0	0.1	0	1	1
FOCAL_ADHESION	12	12	0	0.1	0	1	1
PROTON_TRANSPORTING_TWO_SECTOR_ATPASE_COMPLEX	14	14	0	0.1	0	1	1
NUCLEAR_MEMBRANE	48	48	0	0.3	0	1	1
NUCLEAR_PORE	30	30	0	0.2	0	1	1
NUCLEOLAR_PART	17	17	0	0.1	0	1	1
CORTICAL_CYTOSKELETON	19	19	0	0.1	0	1	1
TRANS_GOLGI_NETWORK	19	19	0	0.1	0	1	1
RESPIRATORY_CHAIN_COMPLEX_I	13	13	0	0.1	0	1	1
SMALL_RIBOSOMAL_SUBUNIT	11	11	0	0.1	0	1	1
TRANSCRIPTION_FACTOR_TFIID_COMPLEX	13	13	0	0.1	0	1	1
MITOCHONDRIAL_RIBOSOME	21	21	0	0.1	0	1	1
APICAL_PLASMA_MEMBRANE	13	13	0	0.1	0	1	1
MICROBODY	47	47	0	0.3	0	1	1
CHROMOSOMAL_PART	90	90	0	0.5	0	1	1
APICOLATERAL_PLASMA_MEMBRANE	32	32	0	0.2	0	1	1
CONDENSED_CHROMOSOME	29	29	0	0.2	0	1	1
NUCLEAR_MEMBRANE_PART	40	40	0	0.2	0	1	1
TRANSCRIPTION_FACTOR_COMPLEX	86	86	0	0.5	0	1	1
LYSOSOME	56	56	0	0.3	0	1	1
EXTRINSIC_TO_MEMBRANE	23	23	0	0.1	0	1	1
SYNAPSE	25	25	0	0.1	0	1	1
INTRINSIC_TO_ORGANELLE_MEMBRANE	50	50	0	0.3	0	1	1
ANCHORED_TO_PLASMA_MEMBRANE	11	11	0	0.1	0	1	1
INTRINSIC_TO_GOLGI_MEMBRANE	14	14	0	0.1	0	1	1
SITE_OF_POLARIZED_GROWTH	11	11	0	0.1	0	1	1
NUCLEAR_SPECK	10	10	0	0.1	0	1	1
PML_BODY	13	13	0	0.1	0	1	1
RIBOSOMAL_SUBUNIT	19	19	0	0.1	0	1	1
CORTICAL_ACTIN_CYTOSKELETON	12	12	0	0.1	0	1	1
ENDOPLASMIC_RETICULUM_LUMEN	13	13	0	0.1	0	1	1
COLLAGEN	22	22	0	0.1	0	1	1
MICROVILLUS	11	11	0	0.1	0	1	1
GROWTH_CONE	10	10	0	0.1	0	1	1
ENDOPLASMIC_RETICULUM_PART	91	91	0	0.5	0	1	1
NEURON_PROJECTION	20	20	0	0.1	0	1	1
PEROXISOME	47	47	0	0.3	0	1	1
CHROMOSOME	112	112	0	0.7	0	1	1
NUCLEAR_CHROMOSOME_PART	30	30	0	0.2	0	1	1

## Sheet: 96-class simulation
	n_genes_in_cc	n_genes_neg	n_genes_pos	prop_neg	prop_pos	p	q	genes
INTEGRAL_TO_PLASMA_MEMBRANE	906	843	63	4.9	17.6	8.77508e-18	1.30159e-15	CCR7,MC3R,GPR55,CD81,CD52,CMKLR1,GPR68,XCR1,S1PR3,PTAFR,MC2R,MC1R,ADORA1,CXCR5,RHO,TSPAN4,MTNR1A,BDKRB2,LAPTM5,CD151,BDKRB1,CD82,TSPAN9,OR1D2,DRD2,GPR45,CD37,SSTR2,GPR17,CXCR6,CCR8,KCNE2,CX3CR1,MC5R,NTSR1,OPRL1,CNR1,OR10J1,TAAR5,RAMP1,CRHR2,CCR9,TACR1,OR1E2,CD63,P2RY6,P2RY1,CXCR2,MAS1,PSENEN,GPR31,FZD10,HTR1E,CAV1,CCR5,CXCR4,SLC13A2,OXTR,ADORA2B,SCN4B,HCAR3,TSPAN15,MAL
INTEGRAL_TO_MEMBRANE	1219	1145	74	6.7	20.7	1.48606e-17	1.30159e-15	CCR7,MC3R,GPR55,EMP2,CD81,CNIH2,CD52,CMKLR1,GPR68,XCR1,S1PR3,PTAFR,KDELR1,MC2R,MC1R,ADORA1,CXCR5,RHO,TSPAN4,MTNR1A,BDKRB2,LAPTM5,CD151,BDKRB1,CD82,TSPAN9,OR1D2,DRD2,GPR45,CD37,SSTR2,GPR17,CXCR6,CCR8,EMP1,KCNE2,CX3CR1,ATP6V0C,MC5R,NTSR1,OPRL1,CNR1,OR10J1,TAAR5,RAMP1,SLN,CRHR2,CCR9,LTC4S,TACR1,OR1E2,CD63,P2RY6,P2RY1,TSPAN1,CXCR2,MAS1,PSENEN,SLC44A2,GPR31,OXGR1,FZD10,HTR1E,CAV1,CCR5,CXCR4,PIGU,SLC13…
INTRINSIC_TO_PLASMA_MEMBRANE	918	855	63	5	17.6	1.67586e-17	1.30159e-15	CCR7,MC3R,GPR55,CD81,CD52,CMKLR1,GPR68,XCR1,S1PR3,PTAFR,MC2R,MC1R,ADORA1,CXCR5,RHO,TSPAN4,MTNR1A,BDKRB2,LAPTM5,CD151,BDKRB1,CD82,TSPAN9,OR1D2,DRD2,GPR45,CD37,SSTR2,GPR17,CXCR6,CCR8,KCNE2,CX3CR1,MC5R,NTSR1,OPRL1,CNR1,OR10J1,TAAR5,RAMP1,CRHR2,CCR9,TACR1,OR1E2,CD63,P2RY6,P2RY1,CXCR2,MAS1,PSENEN,GPR31,FZD10,HTR1E,CAV1,CCR5,CXCR4,SLC13A2,OXTR,ADORA2B,SCN4B,HCAR3,TSPAN15,MAL
PLASMA_MEMBRANE	1321	1244	77	7.3	21.5	2.84484e-17	1.41929e-15	CCR7,MC3R,GPR55,AP2S1,CD81,CD52,CMKLR1,GPR68,XCR1,S1PR3,PTAFR,CAV3,MC2R,MC1R,ADORA1,CXCR5,RHO,GNA11,TSPAN4,MTNR1A,BDKRB2,LAPTM5,CD151,BDKRB1,CD82,VAMP5,TSPAN9,OR1D2,DRD2,GPR45,CD53,CD37,SSTR2,GPR17,CXCR6,CCR8,S1PR1,KCNE2,CX3CR1,MC5R,NTSR1,OPRL1,CNR1,OR10J1,GNAZ,GJB2,ARF1,TAAR5,RAMP1,CRHR2,CCR9,TACR1,OR1E2,CD63,P2RY6,P2RY1,CXCR2,MAS1,PSENEN,GPR31,FZD10,HTR1E,CAV1,CCR5,CXCR4,PIGU,SLC13A2,IFITM1,OXT…
INTRINSIC_TO_MEMBRANE	1235	1161	74	6.8	20.7	3.04569e-17	1.41929e-15	CCR7,MC3R,GPR55,EMP2,CD81,CNIH2,CD52,CMKLR1,GPR68,XCR1,S1PR3,PTAFR,KDELR1,MC2R,MC1R,ADORA1,CXCR5,RHO,TSPAN4,MTNR1A,BDKRB2,LAPTM5,CD151,BDKRB1,CD82,TSPAN9,OR1D2,DRD2,GPR45,CD37,SSTR2,GPR17,CXCR6,CCR8,EMP1,KCNE2,CX3CR1,ATP6V0C,MC5R,NTSR1,OPRL1,CNR1,OR10J1,TAAR5,RAMP1,SLN,CRHR2,CCR9,LTC4S,TACR1,OR1E2,CD63,P2RY6,P2RY1,TSPAN1,CXCR2,MAS1,PSENEN,SLC44A2,GPR31,OXGR1,FZD10,HTR1E,CAV1,CCR5,CXCR4,PIGU,SLC13…
MEMBRANE	1831	1739	92	10.2	25.7	1.575e-16	6.11623e-15	DPM2,CCR7,MC3R,GPR55,COX6B2,AP2S1,EMP2,CD81,CNIH2,CD52,CMKLR1,GPR68,XCR1,S1PR3,PTAFR,KDELR1,CAV3,MC2R,MC1R,ADORA1,CXCR5,RHO,GNA11,TSPAN4,MTNR1A,BDKRB2,LAPTM5,CD151,BDKRB1,CD82,VAMP5,TSPAN9,OR1D2,DRD2,GPR45,CD53,CD37,SSTR2,GPR17,CXCR6,MAP1LC3A,CCR8,S1PR1,EMP1,KCNE2,CX3CR1,ATP6V0C,MC5R,NTSR1,OPRL1,CNR1,OR10J1,GNAZ,GJB2,ARF1,TAAR5,RAMP1,SLN,CRHR2,CCR9,LTC4S,TACR1,OR1E2,CD63,P2RY6,P2RY1,TSPAN1,CXCR2,…
PLASMA_MEMBRANE_PART	1074	1008	66	5.9	18.4	6.46809e-16	2.15295e-14	CCR7,MC3R,GPR55,AP2S1,CD81,CD52,CMKLR1,GPR68,XCR1,S1PR3,PTAFR,CAV3,MC2R,MC1R,ADORA1,CXCR5,RHO,TSPAN4,MTNR1A,BDKRB2,LAPTM5,CD151,BDKRB1,CD82,TSPAN9,OR1D2,DRD2,GPR45,CD37,SSTR2,GPR17,CXCR6,CCR8,KCNE2,CX3CR1,MC5R,NTSR1,OPRL1,CNR1,OR10J1,GJB2,TAAR5,RAMP1,CRHR2,CCR9,TACR1,OR1E2,CD63,P2RY6,P2RY1,CXCR2,MAS1,PSENEN,GPR31,FZD10,HTR1E,CAV1,CCR5,CXCR4,SLC13A2,OXTR,ADORA2B,SCN4B,HCAR3,TSPAN15,MAL
MEMBRANE_PART	1536	1457	79	8.5	22.1	1.13556e-14	3.30731e-13	DPM2,CCR7,MC3R,GPR55,COX6B2,AP2S1,EMP2,CD81,CNIH2,CD52,CMKLR1,GPR68,XCR1,S1PR3,PTAFR,KDELR1,CAV3,MC2R,MC1R,ADORA1,CXCR5,RHO,TSPAN4,MTNR1A,BDKRB2,LAPTM5,CD151,BDKRB1,CD82,TSPAN9,OR1D2,DRD2,GPR45,CD37,SSTR2,GPR17,CXCR6,CCR8,EMP1,KCNE2,CX3CR1,ATP6V0C,MC5R,NTSR1,OPRL1,CNR1,OR10J1,GJB2,TAAR5,RAMP1,SLN,CRHR2,CCR9,LTC4S,TACR1,OR1E2,CD63,P2RY6,P2RY1,TSPAN1,CXCR2,MAS1,PSENEN,SLC44A2,GPR31,OXGR1,FZD10,HTR1…
VACUOLE	64	59	5	0.3	1.4	0.0100538	0.260283	MAP1LC3A,KCNE2,CD63,CXCR2,MAP1LC3C
ENDOPLASMIC_RETICULUM	274	263	11	1.5	3.1	0.0265493	0.618599	DPM2,SERP1,BDKRB1,CLN6,NTSR1,GNAZ,PSENEN,CAV1,SLC36A1,PIGU,MAL
RIBOSOME	35	32	3	0.2	0.8	0.0346035	0.732965	RPS11,SERP1,RPL13A
MYOSIN_COMPLEX	16	14	2	0.1	0.6	0.0417261	0.810182	DYNLL2,MYL5
MEMBRANE_FRACTION	326	315	11	1.8	3.1	0.0741528	1	CD52,KDELR1,CD151,PTGES,TSPAN9,EMP1,LTC4S,SLC13A2,LY6D,TSPAN15,MAL
ER_GOLGI_INTERMEDIATE_COMPARTMENT	24	22	2	0.1	0.6	0.0862904	1	KDELR1,SURF4
LIPID_RAFT	27	25	2	0.1	0.6	0.105492	1	CAV1,MAL
LYTIC_VACUOLE	56	53	3	0.3	0.8	0.107643	1	KCNE2,CD63,CXCR2
LYSOSOME	56	53	3	0.3	0.8	0.107643	1	KCNE2,CD63,CXCR2
INTERCALATED_DISC	8	7	1	0	0.3	0.152947	1	GJB2
LYSOSOMAL_MEMBRANE	9	8	1	0	0.3	0.170346	1	CD63
EXTRACELLULAR_SPACE	227	220	7	1.3	2	0.18696	1	LALBA,FGF18,CCL13,IL4,ASIP,IL3,CETP
VACUOLAR_MEMBRANE	10	9	1	0.1	0.3	0.187388	1	CD63
NUCLEOLUS	111	107	4	0.6	1.1	0.194377	1	FGF18,RPL35,FAM32A,RPL36
EXTRACELLULAR_REGION_PART	314	305	9	1.8	2.5	0.198544	1	CAV3,LALBA,FGF18,CCL13,IL4,ASIP,IL3,CETP,CHAD
VACUOLAR_PART	11	10	1	0.1	0.3	0.204081	1	CD63
ORGANELLE_MEMBRANE	280	272	8	1.6	2.2	0.219125	1	DPM2,COX6B2,AP2S1,MAP1LC3A,CD63,CAV1,PIGU,MAP1LC3C
EXTERNAL_SIDE_OF_PLASMA_MEMBRANE	12	11	1	0.1	0.3	0.220433	1	CCR5
DYSTROPHIN_ASSOCIATED_GLYCOPROTEIN_COMPLEX	12	11	1	0.1	0.3	0.220433	1	CAV3
DNA_DIRECTED_RNA_POLYMERASEII_CORE_COMPLEX	12	11	1	0.1	0.3	0.220433	1	POLR2L
LEADING_EDGE	44	42	2	0.2	0.6	0.228311	1	S100A6,CXCR4
APICAL_PLASMA_MEMBRANE	13	12	1	0.1	0.3	0.236449	1	MAL
ENDOPLASMIC_RETICULUM_LUMEN	13	12	1	0.1	0.3	0.236449	1	CLN6
ENDOCYTIC_VESICLE	14	13	1	0.1	0.3	0.252137	1	AP2S1
CELL_FRACTION	472	460	12	2.7	3.4	0.265104	1	CD52,KDELR1,CD151,PTGES,TSPAN9,EMP1,LTC4S,CCL3,SLC13A2,LY6D,TSPAN15,MAL
VESICLE_COAT	15	14	1	0.1	0.3	0.267504	1	AP2S1
INSOLUBLE_FRACTION	15	14	1	0.1	0.3	0.267504	1	MAL
APICAL_PART_OF_CELL	16	15	1	0.1	0.3	0.282556	1	MAL
COATED_VESICLE_MEMBRANE	16	15	1	0.1	0.3	0.282556	1	AP2S1
MEMBRANE_COAT	16	15	1	0.1	0.3	0.282556	1	AP2S1
COATED_MEMBRANE	16	15	1	0.1	0.3	0.282556	1	AP2S1
ENDOPLASMIC_RETICULUM_PART	91	88	3	0.5	0.8	0.287247	1	DPM2,CLN6,PIGU
RIBONUCLEOPROTEIN_COMPLEX	134	130	4	0.8	1.1	0.2964	1	RPS11,SERP1,RPL13A,SNRPD2
DNA_DIRECTED_RNA_POLYMERASE_COMPLEX	17	16	1	0.1	0.3	0.297299	1	POLR2L
RNA_POLYMERASE_COMPLEX	17	16	1	0.1	0.3	0.297299	1	POLR2L
NUCLEAR_DNA_DIRECTED_RNA_POLYMERASE_COMPLEX	17	16	1	0.1	0.3	0.297299	1	POLR2L
BASAL_LAMINA	19	18	1	0.1	0.3	0.325886	1	CAV3
RIBOSOMAL_SUBUNIT	19	18	1	0.1	0.3	0.325886	1	RPL13A
CYTOPLASMIC_PART	1291	1262	29	7.4	8.1	0.33367	1	AP3S2,DPM2,COX6B2,AP2S1,RPS11,SERP1,KDELR1,CAV3,BDKRB1,HBZ,MAP1LC3A,KCNE2,RPL13A,CLN6,NTSR1,SLC35B4,GNAZ,SURF4,CD63,CXCR2,PSENEN,CAV1,CCR5,SLC36A1,PIGU,MYL5,MAL,VPS26B,MAP1LC3C
CYTOSOLIC_PART	20	19	1	0.1	0.3	0.339741	1	HBZ
CONTRACTILE_FIBER_PART	21	20	1	0.1	0.3	0.353313	1	MYL5
ENDOSOME	62	60	2	0.4	0.6	0.364721	1	CCR5,MAL
SMALL_NUCLEAR_RIBONUCLEOPROTEIN_COMPLEX	22	21	1	0.1	0.3	0.366606	1	SNRPD2
INTRINSIC_TO_ENDOPLASMIC_RETICULUM_MEMBRANE	23	22	1	0.1	0.3	0.379627	1	PIGU
INTERMEDIATE_FILAMENT_CYTOSKELETON	23	22	1	0.1	0.3	0.379627	1	DRD2
CONTRACTILE_FIBER	23	22	1	0.1	0.3	0.379627	1	MYL5
INTEGRAL_TO_ENDOPLASMIC_RETICULUM_MEMBRANE	23	22	1	0.1	0.3	0.379627	1	PIGU
INTERMEDIATE_FILAMENT	23	22	1	0.1	0.3	0.379627	1	DRD2
ENDOMEMBRANE_SYSTEM	206	201	5	1.2	1.4	0.416584	1	DPM2,AP2S1,GNAZ,CAV1,PIGU
CYTOPLASMIC_VESICLE_MEMBRANE	26	25	1	0.1	0.3	0.417109	1	AP2S1
CYTOPLASMIC_VESICLE_PART	26	25	1	0.1	0.3	0.417109	1	AP2S1
CELL_SURFACE	71	69	2	0.4	0.6	0.429835	1	CXCR2,CCR5
VESICLE_MEMBRANE	28	27	1	0.2	0.3	0.440833	1	AP2S1
GOLGI_APPARATUS	213	208	5	1.2	1.4	0.444816	1	AP3S2,NTSR1,SLC35B4,PSENEN,CAV1
RUFFLE	29	28	1	0.2	0.3	0.452332	1	S100A6
EXTRACELLULAR_REGION	417	408	9	2.4	2.5	0.487032	1	CAV3,LALBA,FGF18,CCL13,IL4,ASIP,IL3,CETP,CHAD
ENDOPLASMIC_RETICULUM_MEMBRANE	80	78	2	0.5	0.6	0.49126	1	DPM2,PIGU
BASEMENT_MEMBRANE	34	33	1	0.2	0.3	0.506384	1	CAV3
CLATHRIN_COATED_VESICLE	36	35	1	0.2	0.3	0.526484	1	AP2S1
NUCLEAR_ENVELOPE_ENDOPLASMIC_RETICULUM_NETWORK	88	86	2	0.5	0.6	0.542243	1	DPM2,PIGU
VOLTAGE_GATED_POTASSIUM_CHANNEL_COMPLEX	39	38	1	0.2	0.3	0.555114	1	KCNE2
PROTEINACEOUS_EXTRACELLULAR_MATRIX	91	89	2	0.5	0.6	0.560428	1	CAV3,CHAD
MICROSOME	40	39	1	0.2	0.3	0.564268	1	LTC4S
EXTRACELLULAR_MATRIX	92	90	2	0.5	0.6	0.566374	1	CAV3,CHAD
VESICULAR_FRACTION	42	41	1	0.2	0.3	0.582018	1	LTC4S
GOLGI_MEMBRANE	43	42	1	0.2	0.3	0.59062	1	CAV1
COATED_VESICLE	45	44	1	0.3	0.3	0.607299	1	AP2S1
INTEGRAL_TO_ORGANELLE_MEMBRANE	48	47	1	0.3	0.3	0.631054	1	PIGU
MITOCHONDRIAL_MEMBRANE_PART	49	48	1	0.3	0.3	0.63865	1	COX6B2
SPLICEOSOME	50	49	1	0.3	0.3	0.64609	1	SNRPD2
INTRINSIC_TO_ORGANELLE_MEMBRANE	50	49	1	0.3	0.3	0.64609	1	PIGU
EXTRACELLULAR_MATRIX_PART	53	52	1	0.3	0.3	0.667505	1	CAV3
VESICLE	116	114	2	0.7	0.6	0.69169	1	AP2S1,CETP
MITOCHONDRIAL_INNER_MEMBRANE	59	58	1	0.3	0.3	0.706536	1	COX6B2
ACTIN_CYTOSKELETON	120	118	2	0.7	0.6	0.709409	1	DYNLL2,MYL5
INTERCELLULAR_JUNCTION	61	60	1	0.4	0.3	0.718503	1	GJB2
DNA_DIRECTED_RNA_POLYMERASEII_HOLOENZYME	63	62	1	0.4	0.3	0.729984	1	POLR2L
NON_MEMBRANE_BOUND_ORGANELLE	577	567	10	3.3	2.8	0.750952	1	RPS11,SERP1,DYNLL2,DRD2,RPL13A,FGF18,RPL35,FAM32A,MYL5,RPL36
INTRACELLULAR_NON_MEMBRANE_BOUND_ORGANELLE	577	567	10	3.3	2.8	0.750952	1	RPS11,SERP1,DYNLL2,DRD2,RPL13A,FGF18,RPL35,FAM32A,MYL5,RPL36
ORGANELLE_INNER_MEMBRANE	67	66	1	0.4	0.3	0.751562	1	COX6B2
NUCLEAR_ENVELOPE	68	67	1	0.4	0.3	0.756683	1	GNAZ
ORGANELLE_PART	1114	1094	20	6.4	5.6	0.764941	1	DPM2,COX6B2,AP2S1,DYNLL2,DRD2,MAP1LC3A,RPL13A,CLN6,FGF18,RPL35,GNAZ,POLR2L,CD63,CAV1,FAM32A,SNRPD2,PIGU,MYL5,RPL36,MAP1LC3C
CELL_JUNCTION	77	76	1	0.4	0.3	0.79828	1	GJB2
MITOCHONDRIAL_MEMBRANE	78	77	1	0.5	0.3	0.80244	1	COX6B2
MACROMOLECULAR_COMPLEX	886	871	15	5.1	4.2	0.813678	1	DPM2,AP2S1,RPS11,SERP1,CAV3,DYNLL2,HBZ,KCNE2,RPL13A,GJB2,POLR2L,SNRPD2,PIGU,SCN4B,MYL5
ENVELOPE	154	152	2	0.9	0.6	0.82801	1	COX6B2,GNAZ
ORGANELLE_ENVELOPE	154	152	2	0.9	0.6	0.82801	1	COX6B2,GNAZ
CYTOSKELETAL_PART	221	218	3	1.3	0.8	0.835236	1	DYNLL2,DRD2,MYL5
MITOCHONDRIAL_ENVELOPE	87	86	1	0.5	0.3	0.836232	1	COX6B2
CYTOPLASM	1974	1939	35	11.4	9.8	0.845521	1	AP3S2,DPM2,COX6B2,AP2S1,RPS11,SERP1,KDELR1,CAV3,GNA11,BDKRB1,HBZ,S100A6,MAP1LC3A,KCNE2,RPL13A,CLN6,NTSR1,SLC35B4,GNAZ,SURF4,UBL5,CD63,CXCR2,PSENEN,CAV1,FAM136A,CCR5,CXCR4,SLC36A1,PIGU,LRRC48,MYL5,MAL,VPS26B,MAP1LC3C
GOLGI_APPARATUS_PART	95	94	1	0.6	0.3	0.861397	1	CAV1
NUCLEAR_LUMEN	358	353	5	2.1	1.4	0.86201	1	FGF18,RPL35,POLR2L,FAM32A,RPL36
ORGANELLE_LUMEN	424	418	6	2.4	1.7	0.870949	1	CLN6,FGF18,RPL35,POLR2L,FAM32A,RPL36
MEMBRANE_ENCLOSED_LUMEN	424	418	6	2.4	1.7	0.870949	1	CLN6,FGF18,RPL35,POLR2L,FAM32A,RPL36
INTRACELLULAR_ORGANELLE_PART	1109	1091	18	6.4	5	0.878164	1	DPM2,COX6B2,AP2S1,DYNLL2,DRD2,RPL13A,CLN6,FGF18,RPL35,GNAZ,POLR2L,CD63,CAV1,FAM32A,SNRPD2,PIGU,MYL5,RPL36
CELL_PROJECTION	102	101	1	0.6	0.3	0.88023	1	S100A6
CYTOPLASMIC_MEMBRANE_BOUND_VESICLE	108	107	1	0.6	0.3	0.894327	1	AP2S1
MEMBRANE_BOUND_VESICLE	110	109	1	0.6	0.3	0.898648	1	AP2S1
CYTOPLASMIC_VESICLE	111	110	1	0.6	0.3	0.900742	1	AP2S1
CYTOSOL	193	191	2	1.1	0.6	0.909154	1	HBZ,VPS26B
PROTEIN_COMPLEX	766	755	11	4.4	3.1	0.919752	1	DPM2,AP2S1,CAV3,DYNLL2,HBZ,KCNE2,GJB2,POLR2L,PIGU,SCN4B,MYL5
NUCLEAR_PART	536	529	7	3.1	2	0.926814	1	FGF18,RPL35,GNAZ,POLR2L,FAM32A,SNRPD2,RPL36
MITOCHONDRIAL_PART	129	128	1	0.7	0.3	0.93185	1	COX6B2
SOLUBLE_FRACTION	152	151	1	0.9	0.3	0.957874	1	CCL3
CYTOSKELETON	340	337	3	2	0.8	0.97215	1	DYNLL2,DRD2,MYL5
NUCLEOPLASM_PART	199	198	1	1.2	0.3	0.984268	1	POLR2L
NUCLEOPLASM	261	260	1	1.5	0.3	0.995728	1	POLR2L
MITOCHONDRION	314	313	1	1.8	0.3	0.998603	1	COX6B2
NUCLEUS	1312	1303	9	7.6	2.5	0.99999	1	S100A6,FGF18,RPL35,GNAZ,POLR2L,FAM32A,SNRPD2,SSNA1,RPL36
EXTRINSIC_TO_PLASMA_MEMBRANE	12	12	0	0.1	0	1	1
CELL_PROJECTION_PART	19	19	0	0.1	0	1	1
MITOCHONDRIAL_OUTER_MEMBRANE	18	18	0	0.1	0	1	1
ORGANELLAR_RIBOSOME	21	21	0	0.1	0	1	1
ORGANELLAR_SMALL_RIBOSOMAL_SUBUNIT	11	11	0	0.1	0	1	1
BRUSH_BORDER	10	10	0	0.1	0	1	1
MITOCHONDRIAL_SMALL_RIBOSOMAL_SUBUNIT	11	11	0	0.1	0	1	1
OLIGOSACCHARYL_TRANSFERASE_COMPLEX	9	9	0	0.1	0	1	1
ADHERENS_JUNCTION	21	21	0	0.1	0	1	1
PEROXISOMAL_MEMBRANE	13	13	0	0.1	0	1	1
SARCOMERE	13	13	0	0.1	0	1	1
EUKARYOTIC_TRANSLATION_INITIATION_FACTOR_3_COMPLEX	9	9	0	0.1	0	1	1
PROTEIN_SERINE_THREONINE_PHOSPHATASE_COMPLEX	8	8	0	0	0	1	1
AXON	11	11	0	0.1	0	1	1
MICROTUBULE_ASSOCIATED_COMPLEX	44	44	0	0.3	0	1	1
CHROMATIN	33	33	0	0.2	0	1	1
SYNAPSE_PART	12	12	0	0.1	0	1	1
NUCLEAR_REPLICATION_FORK	8	8	0	0	0	1	1
MICROTUBULE_CYTOSKELETON	142	142	0	0.8	0	1	1
SPINDLE_POLE	18	18	0	0.1	0	1	1
LATE_ENDOSOME	9	9	0	0.1	0	1	1
MYOFIBRIL	17	17	0	0.1	0	1	1
INTEGRAL_TO_GOLGI_MEMBRANE	9	9	0	0.1	0	1	1
NUCLEAR_CHROMOSOME	44	44	0	0.3	0	1	1
CHROMATIN_REMODELING_COMPLEX	15	15	0	0.1	0	1	1
TIGHT_JUNCTION	29	29	0	0.2	0	1	1
MICROTUBULE_ORGANIZING_CENTER_PART	18	18	0	0.1	0	1	1
CORNIFIED_ENVELOPE	13	13	0	0.1	0	1	1
NADH_DEHYDROGENASE_COMPLEX	13	13	0	0.1	0	1	1
UBIQUITIN_LIGASE_COMPLEX	25	25	0	0.1	0	1	1
KINESIN_COMPLEX	14	14	0	0.1	0	1	1
PROTEASOME_COMPLEX	22	22	0	0.1	0	1	1
PORE_COMPLEX	35	35	0	0.2	0	1	1
SPINDLE	38	38	0	0.2	0	1	1
LAMELLIPODIUM	22	22	0	0.1	0	1	1
SYNAPTIC_VESICLE	15	15	0	0.1	0	1	1
NUCLEAR_MATRIX	11	11	0	0.1	0	1	1
IMMUNOLOGICAL_SYNAPSE	11	11	0	0.1	0	1	1
PEROXISOMAL_PART	14	14	0	0.1	0	1	1
CHROMOSOMEPERICENTRIC_REGION	29	29	0	0.2	0	1	1
VOLTAGE_GATED_CALCIUM_CHANNEL_COMPLEX	14	14	0	0.1	0	1	1
ANCHORED_TO_MEMBRANE	11	11	0	0.1	0	1	1
MEDIATOR_COMPLEX	16	16	0	0.1	0	1	1
MITOCHONDRIAL_MATRIX	43	43	0	0.3	0	1	1
INTEGRATOR_COMPLEX	13	13	0	0.1	0	1	1
OUTER_MEMBRANE	24	24	0	0.1	0	1	1
HISTONE_DEACETYLASE_COMPLEX	18	18	0	0.1	0	1	1
APICAL_JUNCTION_COMPLEX	32	32	0	0.2	0	1	1
CELL_CORTEX_PART	23	23	0	0.1	0	1	1
MICROBODY_MEMBRANE	13	13	0	0.1	0	1	1
MITOCHONDRIAL_LUMEN	43	43	0	0.3	0	1	1
EARLY_ENDOSOME	18	18	0	0.1	0	1	1
PERINUCLEAR_REGION_OF_CYTOPLASM	52	52	0	0.3	0	1	1
CELL_CORTEX	38	38	0	0.2	0	1	1
SPINDLE_MICROTUBULE	15	15	0	0.1	0	1	1
CELL_SUBSTRATE_ADHERENS_JUNCTION	15	15	0	0.1	0	1	1
HETEROGENEOUS_NUCLEAR_RIBONUCLEOPROTEIN_COMPLEX	12	12	0	0.1	0	1	1
MITOCHONDRIAL_RESPIRATORY_CHAIN_COMPLEX_I	13	13	0	0.1	0	1	1
CONDENSED_NUCLEAR_CHROMOSOME	14	14	0	0.1	0	1	1
NUCLEAR_BODY	31	31	0	0.2	0	1	1
CELL_MATRIX_JUNCTION	17	17	0	0.1	0	1	1
MICROTUBULE	30	30	0	0.2	0	1	1
ORGANELLE_OUTER_MEMBRANE	23	23	0	0.1	0	1	1
NUCLEAR_UBIQUITIN_LIGASE_COMPLEX	10	10	0	0.1	0	1	1
ACTIN_FILAMENT	15	15	0	0.1	0	1	1
MICROTUBULE_ORGANIZING_CENTER	64	64	0	0.4	0	1	1
NICOTINIC_ACETYLCHOLINE_GATED_RECEPTOR_CHANNEL_COMPLEX	11	11	0	0.1	0	1	1
TRANSPORT_VESICLE	29	29	0	0.2	0	1	1
CELL_SOMA	10	10	0	0.1	0	1	1
REPLICATION_FORK	16	16	0	0.1	0	1	1
U12_DEPENDENT_SPLICEOSOME	10	10	0	0.1	0	1	1
MICROBODY_PART	14	14	0	0.1	0	1	1
DENDRITE	15	15	0	0.1	0	1	1
KINETOCHORE	23	23	0	0.1	0	1	1
NUCLEAR_CHROMATIN	13	13	0	0.1	0	1	1
RECEPTOR_COMPLEX	53	53	0	0.3	0	1	1
SECRETORY_GRANULE	17	17	0	0.1	0	1	1
BASOLATERAL_PLASMA_MEMBRANE	33	33	0	0.2	0	1	1
MITOCHONDRIAL_RESPIRATORY_CHAIN	22	22	0	0.1	0	1	1
GOLGI_STACK	12	12	0	0.1	0	1	1
FOCAL_ADHESION	12	12	0	0.1	0	1	1
CENTROSOME	55	55	0	0.3	0	1	1
PROTON_TRANSPORTING_TWO_SECTOR_ATPASE_COMPLEX	14	14	0	0.1	0	1	1
NUCLEAR_MEMBRANE	48	48	0	0.3	0	1	1
NUCLEAR_PORE	30	30	0	0.2	0	1	1
NUCLEOLAR_PART	17	17	0	0.1	0	1	1
CORTICAL_CYTOSKELETON	19	19	0	0.1	0	1	1
TRANS_GOLGI_NETWORK	19	19	0	0.1	0	1	1
RESPIRATORY_CHAIN_COMPLEX_I	13	13	0	0.1	0	1	1
SMALL_RIBOSOMAL_SUBUNIT	11	11	0	0.1	0	1	1
TRANSCRIPTION_FACTOR_TFIID_COMPLEX	13	13	0	0.1	0	1	1
MITOCHONDRIAL_RIBOSOME	21	21	0	0.1	0	1	1
MICROBODY	47	47	0	0.3	0	1	1
CHROMOSOMAL_PART	90	90	0	0.5	0	1	1
APICOLATERAL_PLASMA_MEMBRANE	32	32	0	0.2	0	1	1
CONDENSED_CHROMOSOME	29	29	0	0.2	0	1	1
NUCLEAR_MEMBRANE_PART	40	40	0	0.2	0	1	1
GOLGI_ASSOCIATED_VESICLE	26	26	0	0.2	0	1	1
TRANSCRIPTION_FACTOR_COMPLEX	86	86	0	0.5	0	1	1
EXTRINSIC_TO_MEMBRANE	23	23	0	0.1	0	1	1
SYNAPSE	25	25	0	0.1	0	1	1
ANCHORED_TO_PLASMA_MEMBRANE	11	11	0	0.1	0	1	1
INTRINSIC_TO_GOLGI_MEMBRANE	14	14	0	0.1	0	1	1
SITE_OF_POLARIZED_GROWTH	11	11	0	0.1	0	1	1
NUCLEAR_SPECK	10	10	0	0.1	0	1	1
PML_BODY	13	13	0	0.1	0	1	1
CORTICAL_ACTIN_CYTOSKELETON	12	12	0	0.1	0	1	1
COLLAGEN	22	22	0	0.1	0	1	1
MICROVILLUS	11	11	0	0.1	0	1	1
INTEGRIN_COMPLEX	19	19	0	0.1	0	1	1
GROWTH_CONE	10	10	0	0.1	0	1	1
TRANS_GOLGI_NETWORK_TRANSPORT_VESICLE	12	12	0	0.1	0	1	1
NEURON_PROJECTION	20	20	0	0.1	0	1	1
PEROXISOME	47	47	0	0.3	0	1	1
CHROMOSOME	112	112	0	0.7	0	1	1
NUCLEAR_CHROMOSOME_PART	30	30	0	0.2	0	1	1
